# Supplementary material for: Novel Photoluminescence and Optical Thermometry of Solvothermally Derived Tetragonal ZrO2:Ti4+,Eu3+ Nanocrystals
Source: MDPI journal article supplement (doi:10.3390/chemosensors12040062), 2024-04-15
Supplement: s1 [file s1]

## Supplementary Materials

### Novel Photoluminescence and Optical Thermometry of

### Solvothermally derived Tetragonal $\text{ZrO}_2\text{:Ti}^{4+},\text{Eu}^{3+}$ Nanocrystals

Lu Li<sup>1</sup>, Xuesong Qu<sup>1\*</sup>, Guo-Hui Pan<sup>2\*</sup>, Jung Hyun Jeong<sup>3\*</sup>

<sup>1</sup>*Department of Physics, Changchun Normal University, Changchun 130032, China*

<sup>2</sup>*State Key Laboratory of Luminescence Science and Technology, Changchun Institute of Optics, Fine Mechanics and Physics, Chinese Academy of Sciences, Changchun 130033, China*

<sup>3</sup>*Department of Physics, Pukyong National University, Busan 608-737, Republic of Korea*

To whom correspondence should be addressed: [qxs0913@163.com](mailto:qxs0913@163.com),  
[guohui.pan@aliyun.com](mailto:guohui.pan@aliyun.com), [jhjeong@pknu.ac.kr](mailto:jhjeong@pknu.ac.kr)

**Table S1.** The assignment of the observed emission lines for  $\text{Eu}^{3+}$  in the t-ZrO<sub>2</sub> NCs and fluorescence decay constants yielded by bi-exponential fitting

| $\text{Eu}^{3+}$ type | $^5\text{D}_0 \rightarrow ^7\text{F}_1$<br>magnetic<br>dipole<br>transition<br>(nm) | $^5\text{D}_0 \rightarrow ^7\text{F}_2$<br>forced electric<br>dipole transition<br>(nm) | $^5\text{D}_0 \rightarrow ^7\text{F}_3$<br>forbidden<br>transition by the<br>electric dipole<br>and the<br>magnetic dipole<br>(nm) | $^5\text{D}_0 \rightarrow ^7\text{F}_4$<br>forced electric<br>dipole<br>transition (nm) | Fluorescence<br>decay constants<br>(ms)    |
|-----------------------|-------------------------------------------------------------------------------------|-----------------------------------------------------------------------------------------|------------------------------------------------------------------------------------------------------------------------------------|-----------------------------------------------------------------------------------------|--------------------------------------------|
| Eu(I)                 | 592.2                                                                               | 607.0,<br>634.0                                                                         | 628.0, 652.0, 660.0                                                                                                                | 714.8                                                                                   | $\tau_1 \sim 6.23$ ,<br>$\tau_2 \sim 2.54$ |
| Eu(II)                | 591.6, 597.2                                                                        | 614.0,<br>631.2                                                                         | 626.4, 656.2                                                                                                                       | 713.0                                                                                   | $\tau_1 \sim 6.23$ ,<br>$\tau_2 \sim 2.54$ |

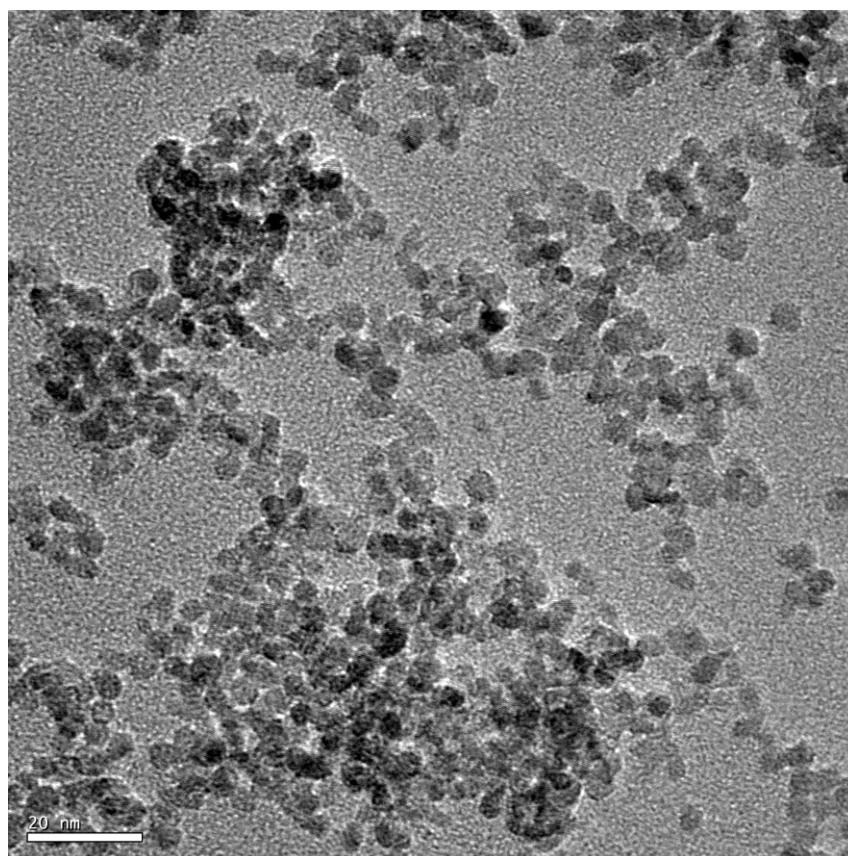

**Figure S1.** TEM image of t-ZrO<sub>2</sub>:4%Ti<sup>4+</sup>,1%Eu<sup>3+</sup> NCs.

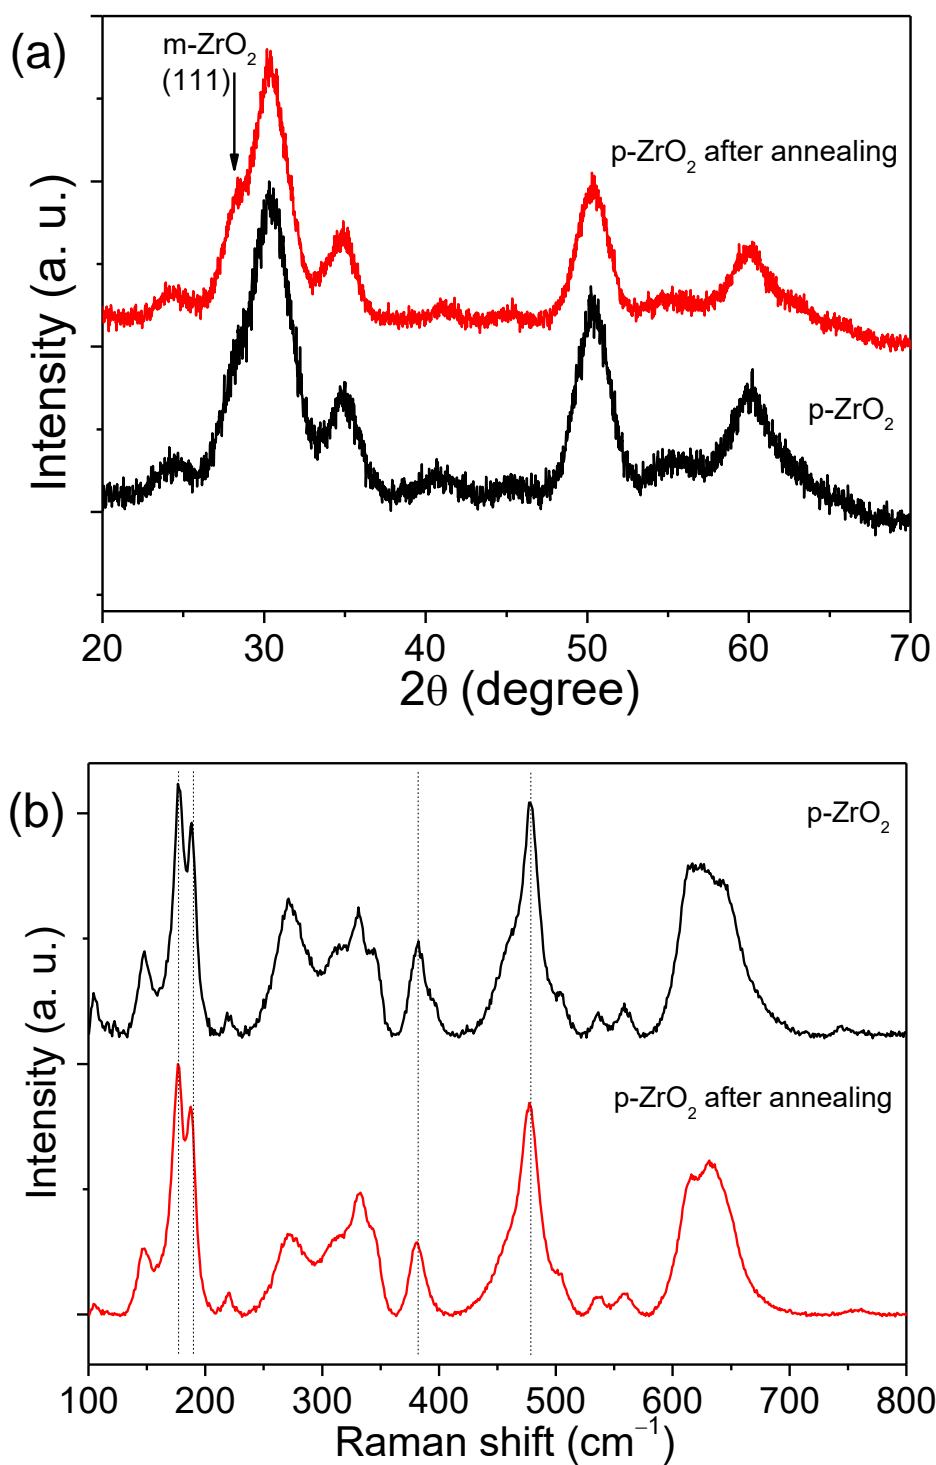

**Figure S2.** (a) Powder XRD patterns and (b) Raman spectra of p-ZrO<sub>2</sub> NCs before and after annealing at 400 °C; the dash lines in (b) indicate the modes of m-ZrO<sub>2</sub>.

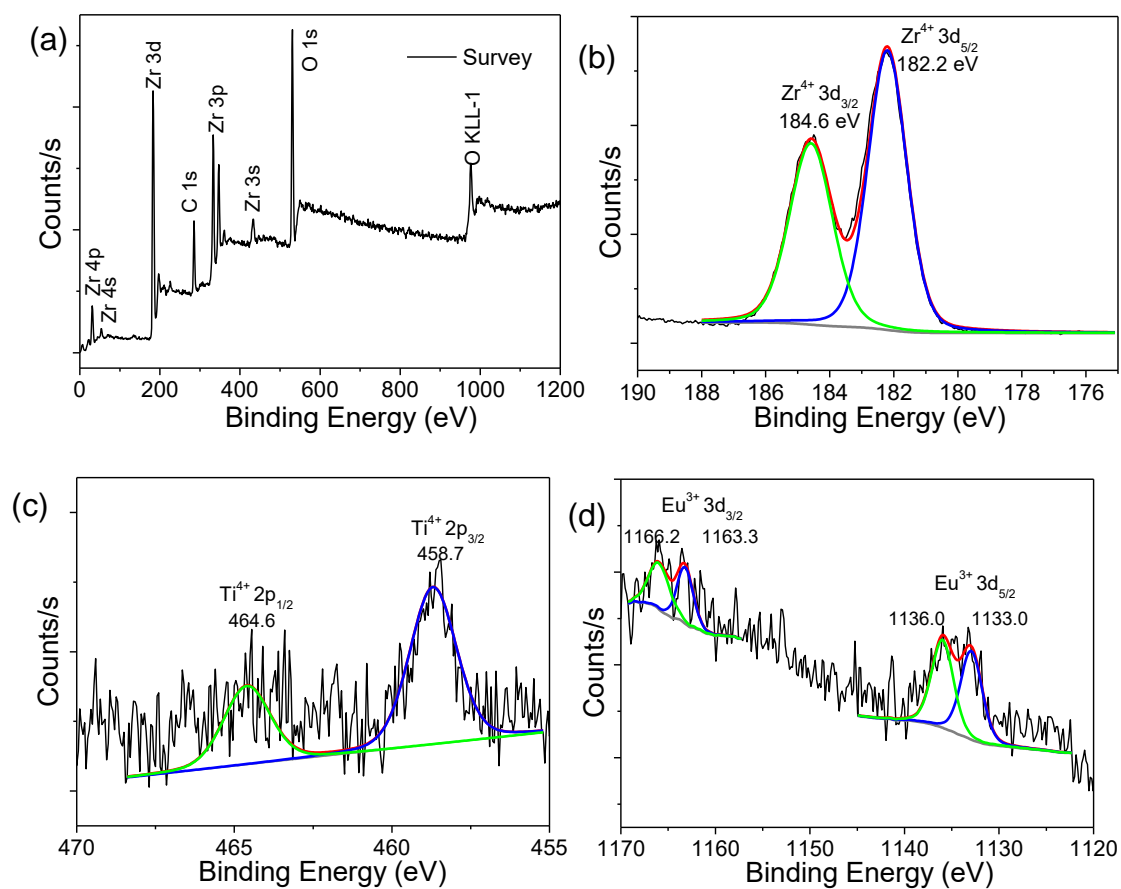

**Figure S3.** (a) XPS survey spectrum of t-ZrO<sub>2</sub>:4%Ti<sup>4+</sup>,1%Eu<sup>3+</sup> NCs and XPS high resolution spectra of (b) Zr 3d, (c) Ti 2p and (d) Eu 3d in t-ZrO<sub>2</sub>:4%Ti<sup>4+</sup>,1%Eu<sup>3+</sup> NCs.

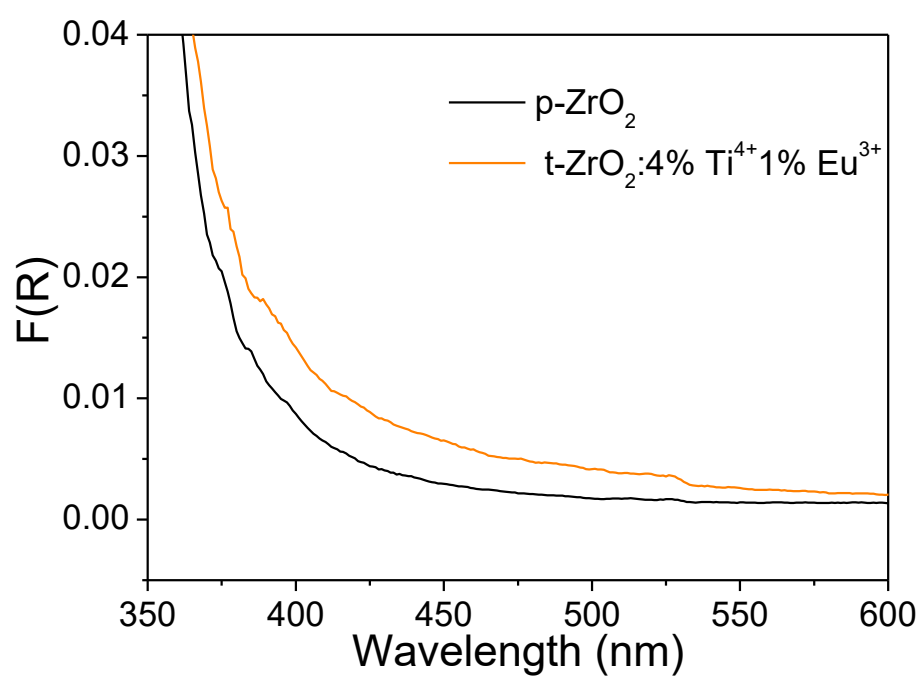

**Figure S4.** The enlarged diffuse reflection-UV-visible spectra of the as-synthesized  $p\text{-ZrO}_2$  and  $t\text{-ZrO}_2:4\% \text{Ti}^{4+}, 1\% \text{Eu}^{3+}$  NCs in the  $F(R)$  range of 0.0–0.04.

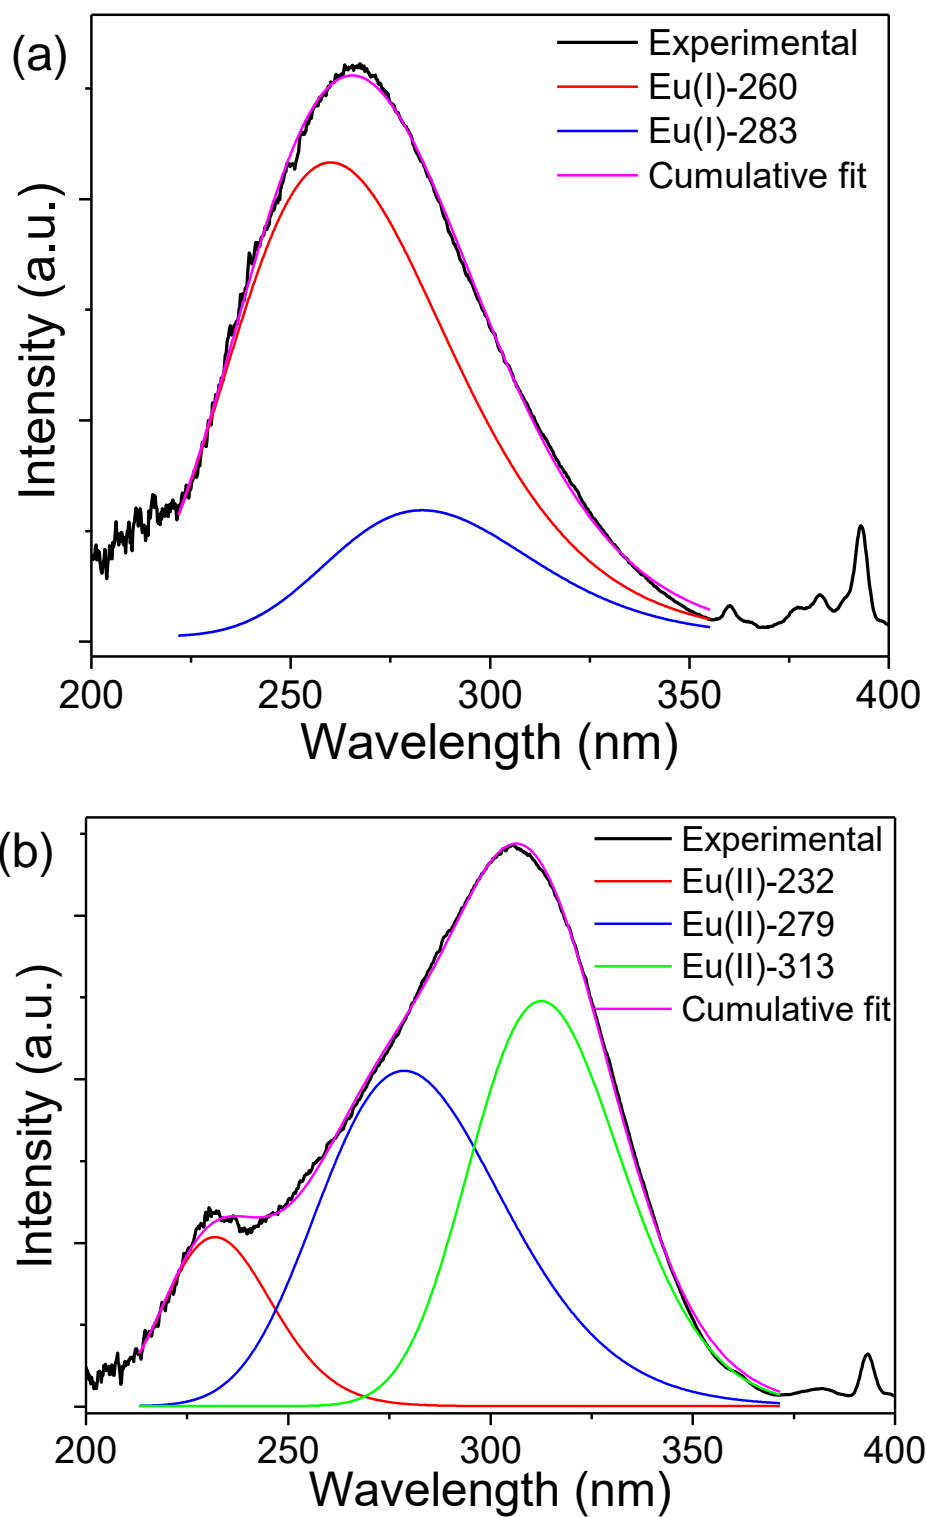

**Figure S5.** PL excitation spectra of t-ZrO<sub>2</sub>:1%Eu<sup>3+</sup> NCs by monitoring the relative maxima of Eu(I) ((a),  $\lambda_{em}$ =607) and Eu(II) ((b),  $\lambda_{em}$ = 614 nm) and their spectral decomposition of the corresponding broadband with Gauss typed peaks.

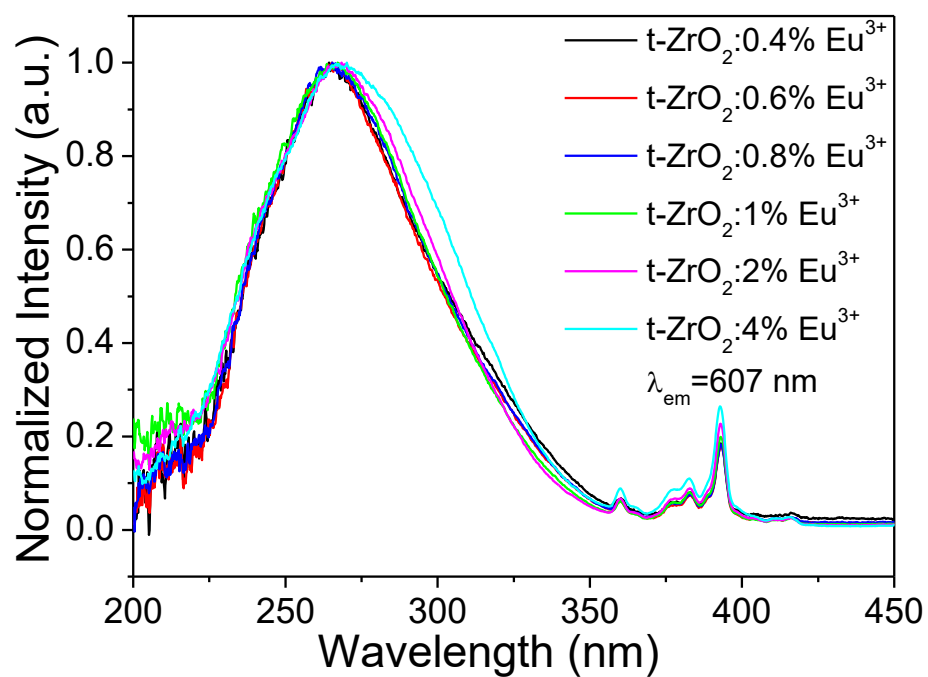

**Figure S6.** Normalized PL excitation spectra of t-ZrO<sub>2</sub>:xEu<sup>3+</sup> (x=0.4%, 0.6%, 0.8%, 1%, 2% and 4%) NCs by monitoring the relative maxima of Eu(I) ( $\lambda_{em}$ =607).



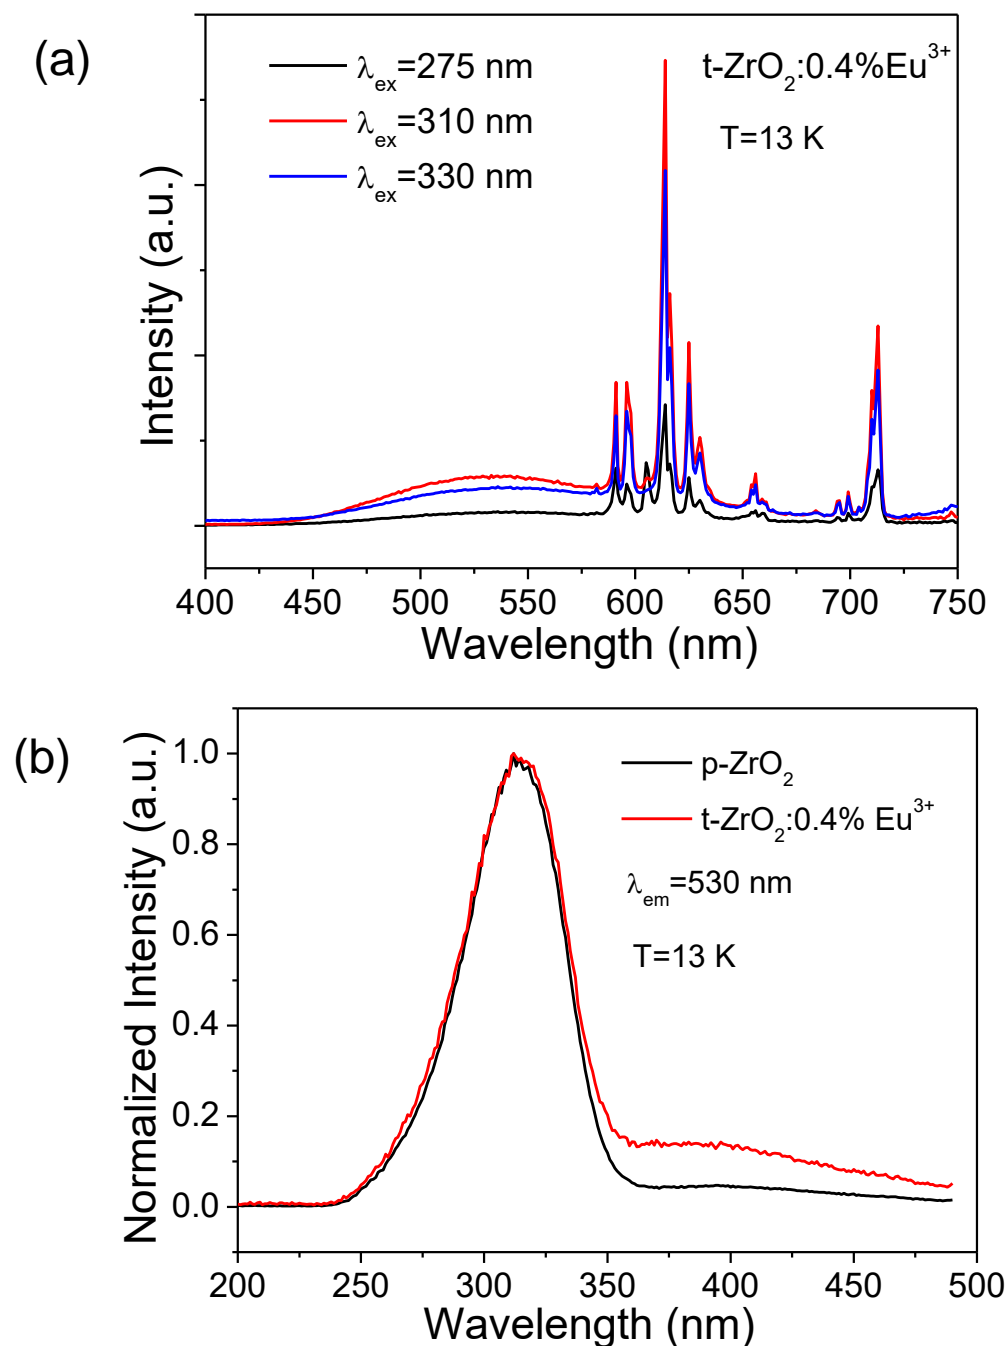

**Figure S7.** (a) The bright broadband PL emissions of CT ( $\text{Ti}^{3+} \rightarrow \text{O}^-$ ) transitions in  $t\text{-ZrO}_2:0.4\%\text{Eu}^{3+}$  NCs upon excitation into titanate groups at 13 K, together with the spectral superimposition of stronger sharp line emissions of  $\text{Eu}^{3+}$  due to nonradiative energy transfer; (b) Normalized PL excitation spectra of  $p\text{-ZrO}_2$  and  $t\text{-ZrO}_2:0.4\%\text{Eu}^{3+}$  NCs upon monitoring the peak of the broadband emissions at 530 nm.

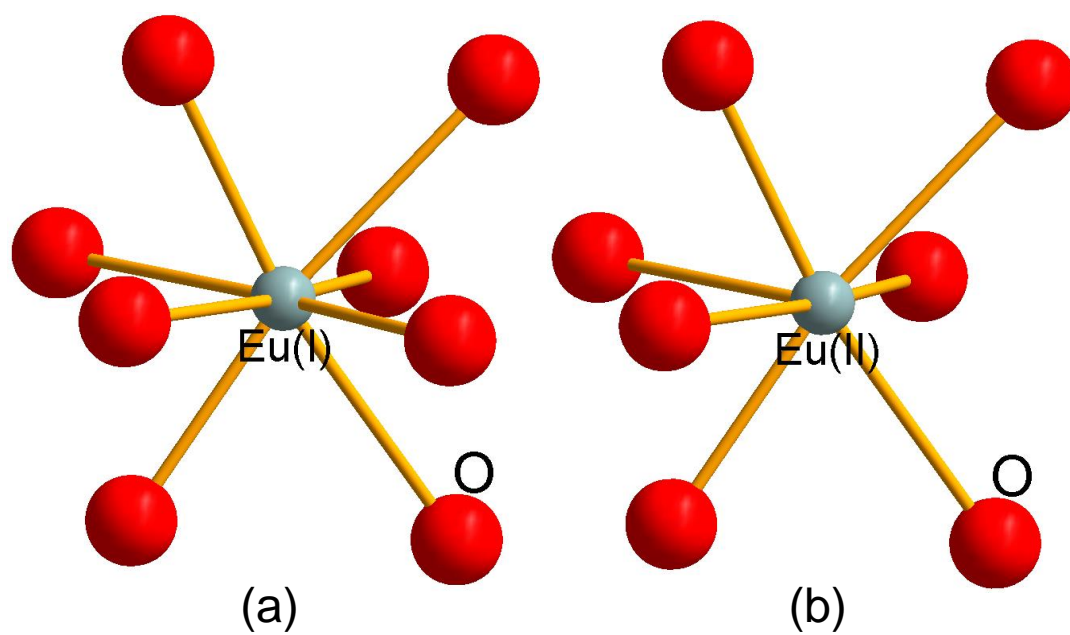

**Figure S8.** The scheme of oxygen coordination spheres of Eu(I) (a) and Eu (II) (b) in t-ZrO<sub>2</sub> NCs.

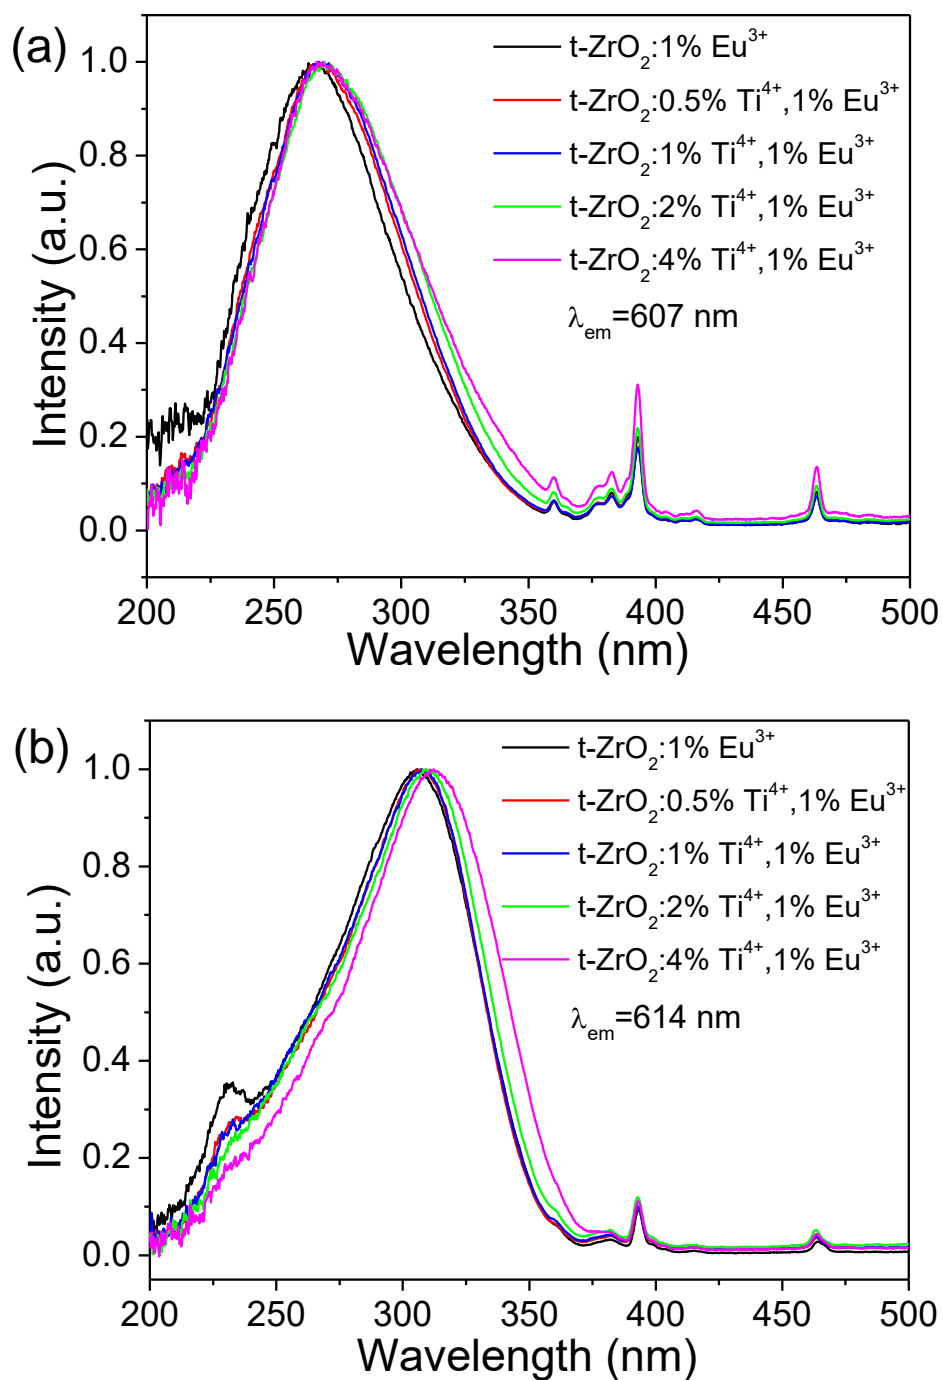

**Figure S9.** Normalized PL excitation spectra of t-ZrO<sub>2</sub>:*x*Ti<sup>4+</sup>, 1% Eu<sup>3+</sup> (*x*=0, 0.5%, 1%, 2% and 4%) NCs by monitoring the relative maxima of Eu(I) ((**a**),  $\lambda_{em}$ =607) and Eu(II) ((**b**),  $\lambda_{em}$ = 614 nm).

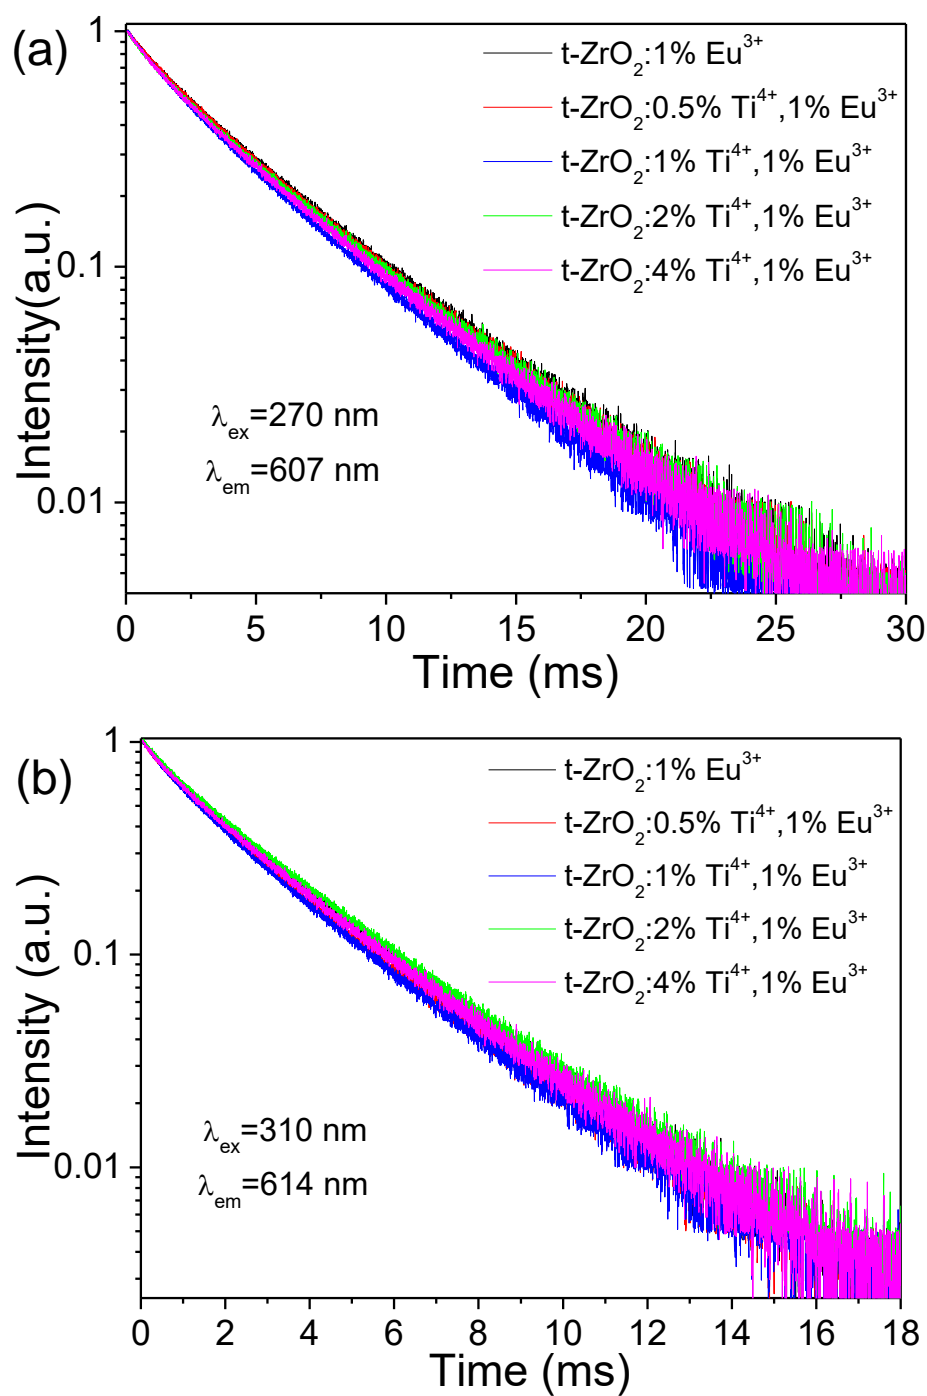

**Figure S10.** Fluorescence decay traces of t-ZrO<sub>2</sub>:xTi<sup>4+</sup>,1%Eu<sup>3+</sup> ( $x=0, 0.5\%, 1\%, 2\%$  and  $4\%$ ) NCs by monitoring the relative maxima of Eu(I) ((a),  $\lambda_{\text{ex}}=270$  nm,  $\lambda_{\text{em}}=607$ ) and Eu(II) ((b),  $\lambda_{\text{ex}}=310$  nm,  $\lambda_{\text{em}}=614$  nm).

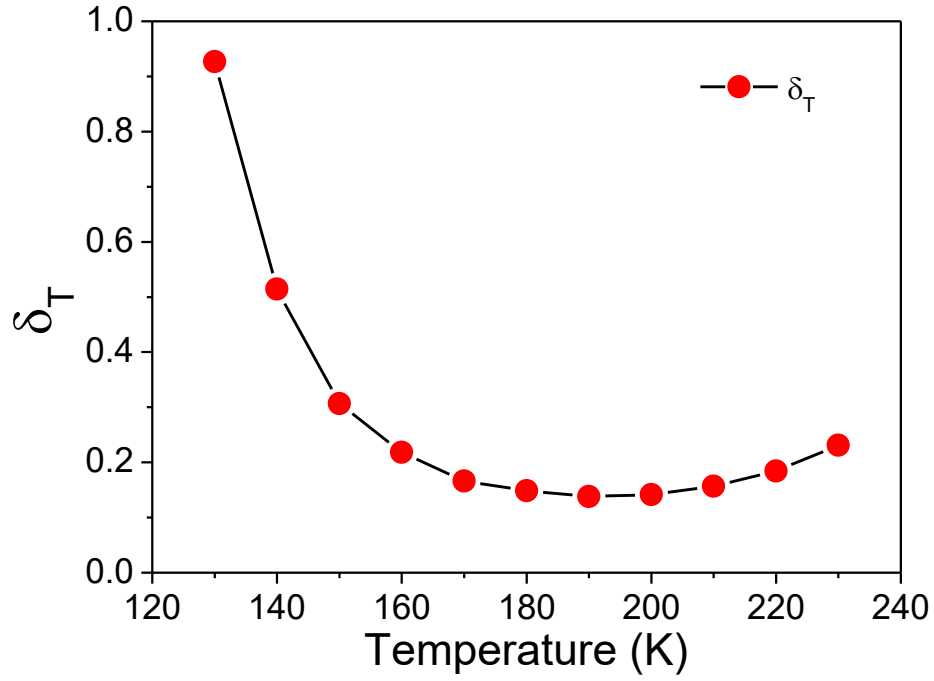

**Figure S11.** Temperature resolution  $\delta_T$  of t-ZrO<sub>2</sub>:0.4%Eu<sup>3+</sup> NCs temperature sensing material in the temperature range from 130 to 230 K.

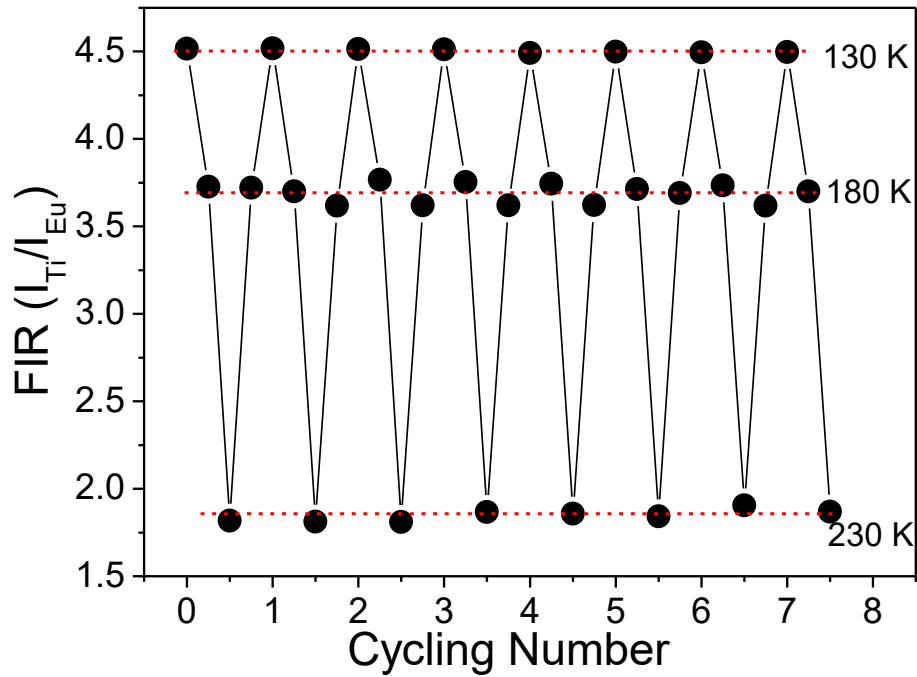

**Figure S12.** Temperature-induced switching of the FIR between the titanate groups signals ( $I_{Ti}$ ) (450–580 nm) and Eu<sup>3+</sup> signals (690–725 nm) ( $I_{Eu}$ ) (alternating between 130 K and 230 K). The dashed line is drawn to guide the eyes.
